# Supplementary material
Source: PubMed Central journal article supplement (PMC7291828)
Supplement: NIHMS1595618-supplement-SI.pdf [file NIHMS1595618-supplement-SI.pdf]

# Enhancing the Cell-Permeability of Stapled Peptides with a Cyclic Cell-Penetrating Peptide

Patrick G. Dougherty, Jin Wen, Xiaoyan Pan, Amritendu Koley, Jian-Guo Ren, Ashweta Sahni, Ruchira Basu, Heba Salim, George Appiah Kubi, Ziqing Qian, and Dehua Pei\*

## Supporting Information

### Table of Contents

|                         |     |
|-------------------------|-----|
| <b>Table S1</b> .....   | S2  |
| <b>Figure S1</b> .....  | S3  |
| <b>Figure S2</b> .....  | S18 |
| <b>Figure S3</b> .....  | S18 |
| <b>Figure S4</b> .....  | S19 |
| <b>Figure S5</b> .....  | S20 |
| <b>Figure S6</b> .....  | S21 |
| <b>Figure S7</b> .....  | S22 |
| <b>Figure S8</b> .....  | S23 |
| <b>Figure S9</b> .....  | S24 |
| <b>Figure S10</b> ..... | S25 |
| <b>Figure S11</b> ..... | S25 |

**Table S1.** Purity and MS data of compounds **1-25**

| Compound  | HPLC Purity (%)          | [M+H] <sup>+</sup> calculated | HRMS [M+H] <sup>+</sup> observed |
|-----------|--------------------------|-------------------------------|----------------------------------|
| <b>1</b>  | 95.23                    | 2222.0593                     | 2222.060                         |
| <b>2</b>  | 95.71                    | 1834.9486                     | 1834.949                         |
| <b>3</b>  | 95.59                    | 2744.4320                     | 2744.436                         |
| <b>4</b>  | 97.71                    | 2914.5375                     | 2914.546                         |
| <b>5</b>  | 95.62                    | 2838.5062                     | 2838.509                         |
| <b>6</b>  | 97.27                    | 3417.8991                     | 3417.887                         |
| <b>7</b>  | 98.81                    | 3281.8692                     | 3281.860                         |
| <b>8</b>  | 97.50                    | 2388.0827                     | 2388.074                         |
| <b>9</b>  | 96.41                    | 3444.8763                     | 3444.855                         |
| <b>10</b> | 97.95                    | 3948.2379                     | 3948.206                         |
| <b>11</b> | 96.62                    | 3812.2079                     | 1906.607 [M+2H] <sup>2+</sup>    |
| <b>12</b> | 95.08 (combined 2 peaks) | 1702.7339                     | 1702.733                         |
| <b>13</b> | 97.75 (combined 2 peaks) | 3098.4969                     | 3098.505                         |
| <b>14</b> | 95.22                    | 2415.9871                     | 2415.989                         |
| <b>15</b> | 96.70                    | 3811.7507                     | 3811.728                         |
| <b>16</b> | 95.12 (combined 2 peaks) | 2286.9445                     | 2286.943                         |
| <b>17</b> | 95.76                    | 3682.7081                     | 1841.858 [M+2H] <sup>2+</sup>    |
| <b>18</b> | 98.7                     | 2355.9956                     | 2355.990                         |
| <b>19</b> | 98.56                    | 3751.7592                     | 1876.382 [M+2H] <sup>2+</sup>    |
| <b>20</b> | 98.53 (combined 2 peaks) | 2275.9503                     | 2275.950                         |
| <b>21</b> | 97.04                    | 3671.7139                     | 3671.692                         |
| <b>22</b> | 96.15 (combined 2 peaks) | 2291.9088                     | 2291.909                         |
| <b>23</b> | 94.13 (combined 2 peaks) | 3687.6725                     | 3687.656                         |
| <b>24</b> | 92.30 (combined 2 peaks) | 2420.9514                     | 2420.952                         |
| <b>25</b> | 98.73                    | 3816.7151                     | 3816.707                         |

**Figure S1.** Structures, purity (by reversed-phase HPLC), and HR-MS (FT-ICR) of peptides **1-25** used in this work. Note: Some of the dye-labeled peptides (**12-25**) eluted as two separate peaks, because the commercially available NF and FAM are mixtures of 5- and 6-carboxy isomers.

### Peptide 1

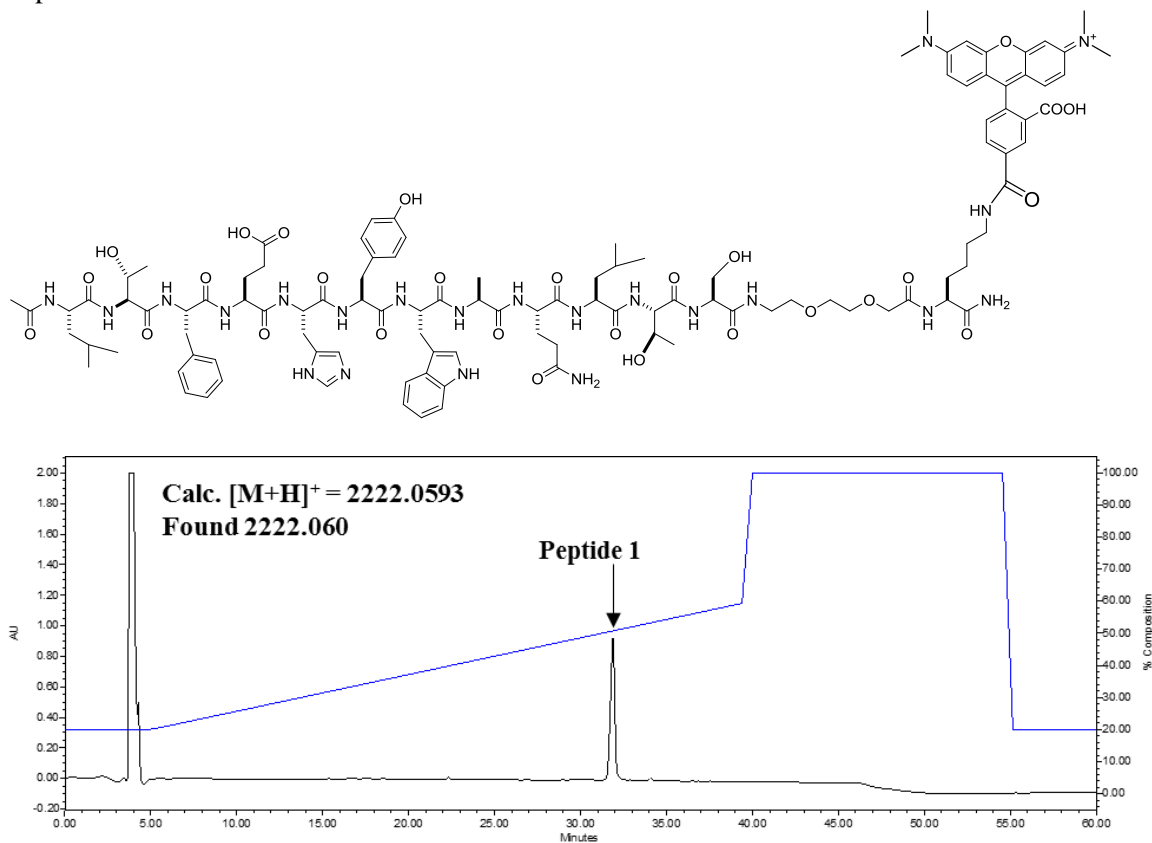

### Peptide 2

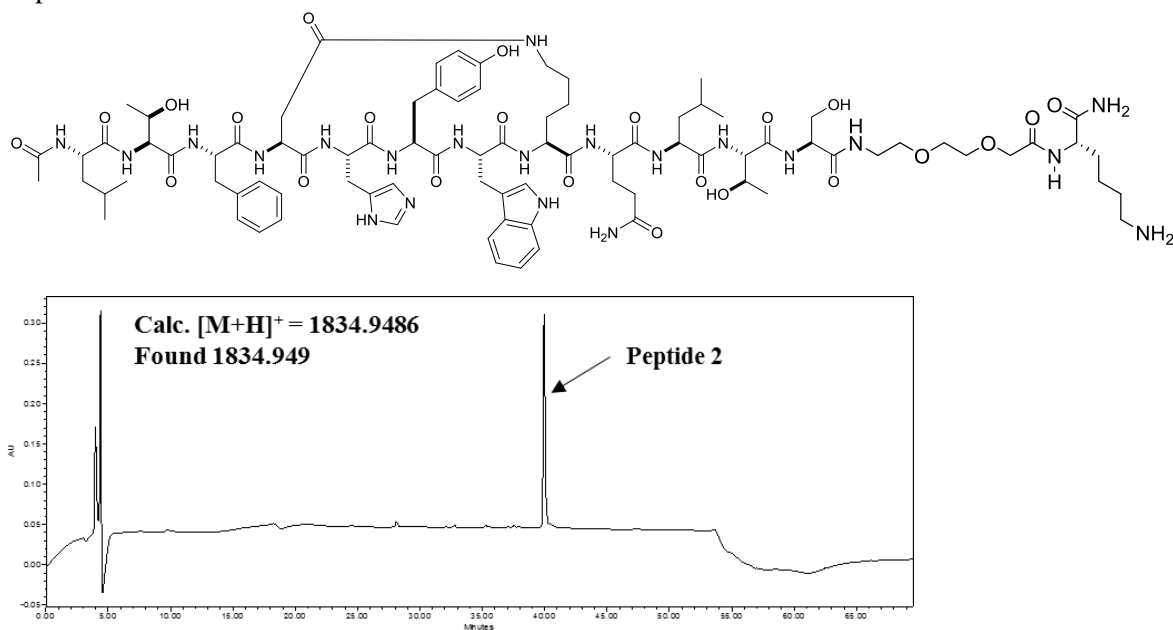















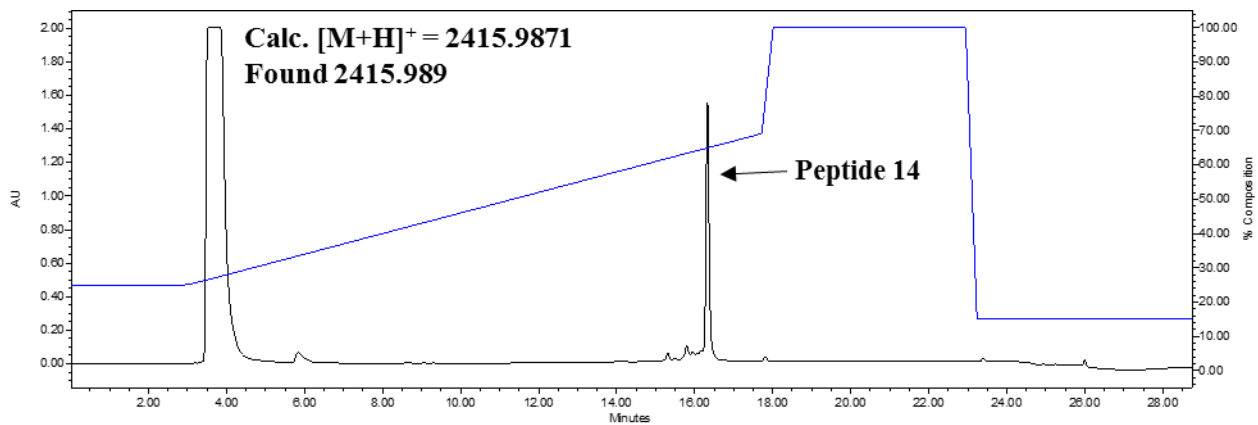

Peptide 15

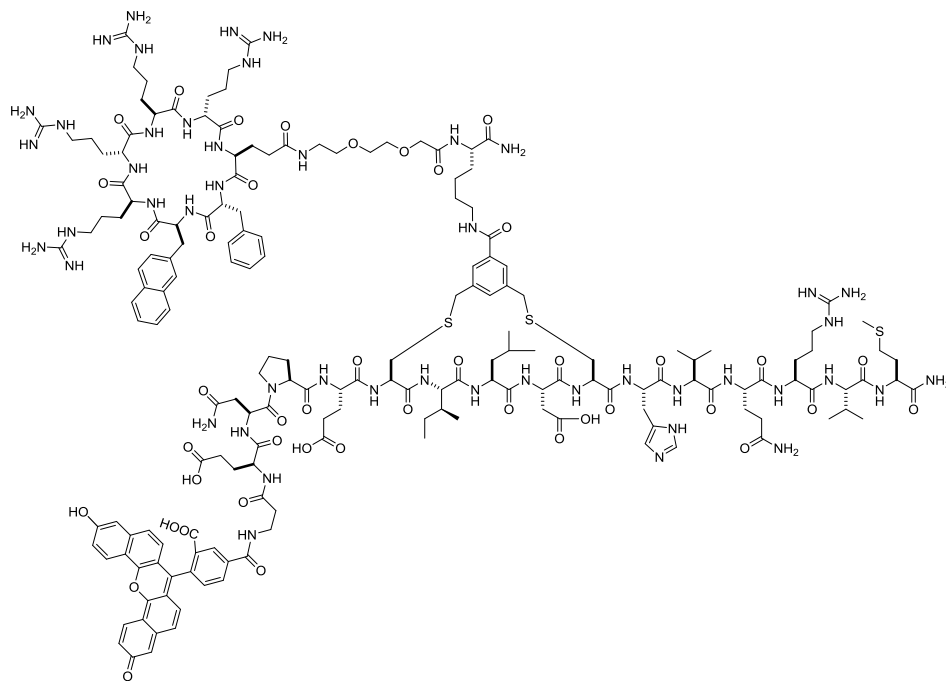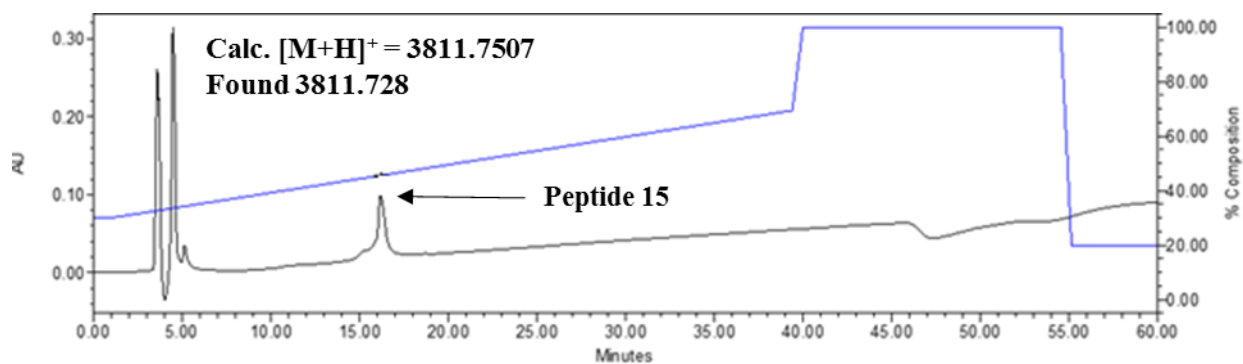

## Peptide 16

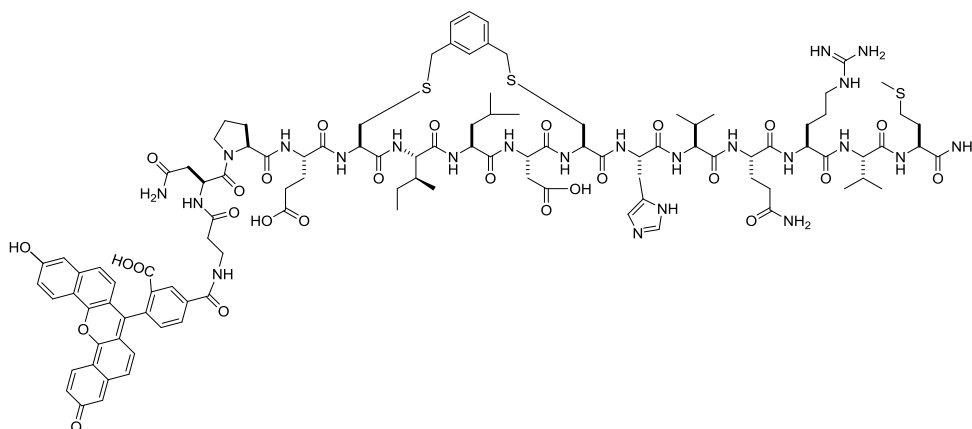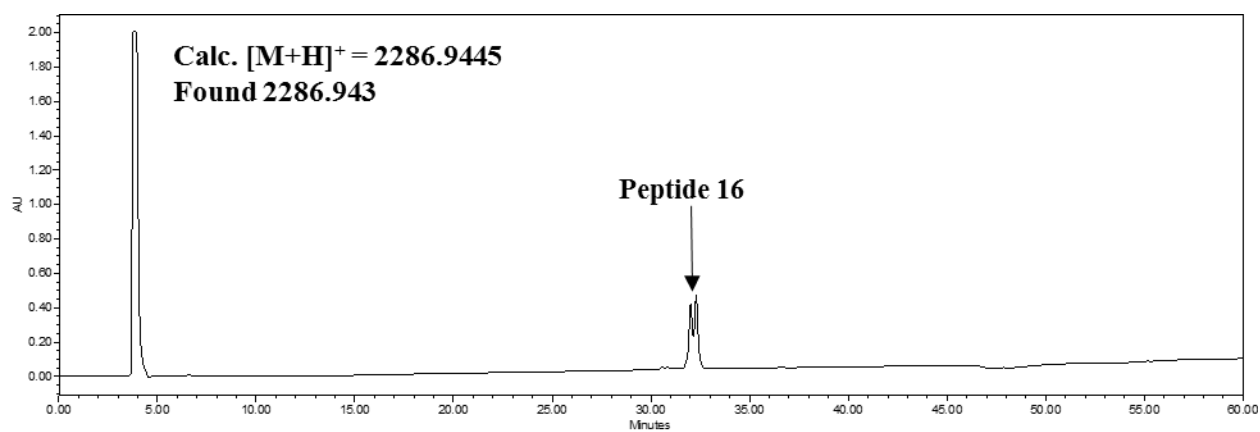

## Peptide 17

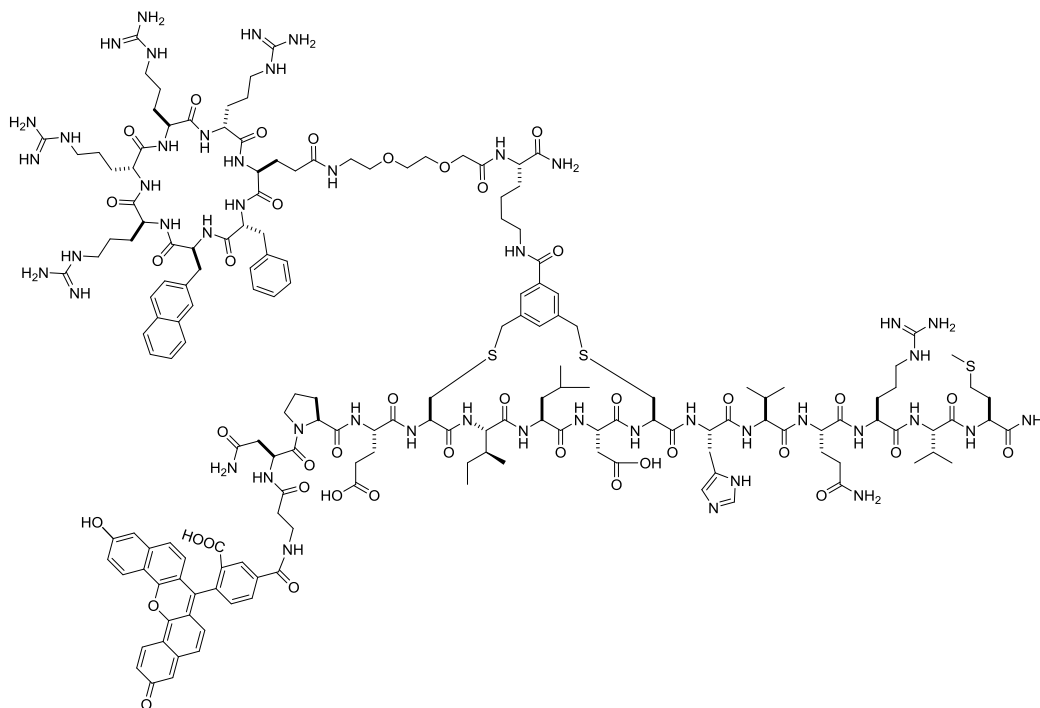



## Peptide 19

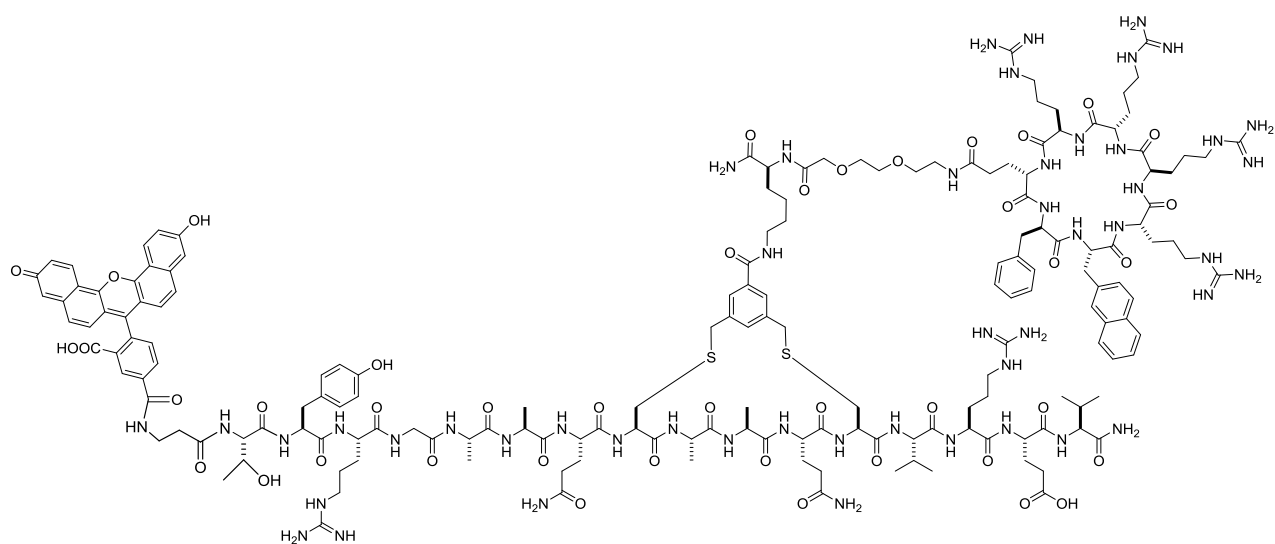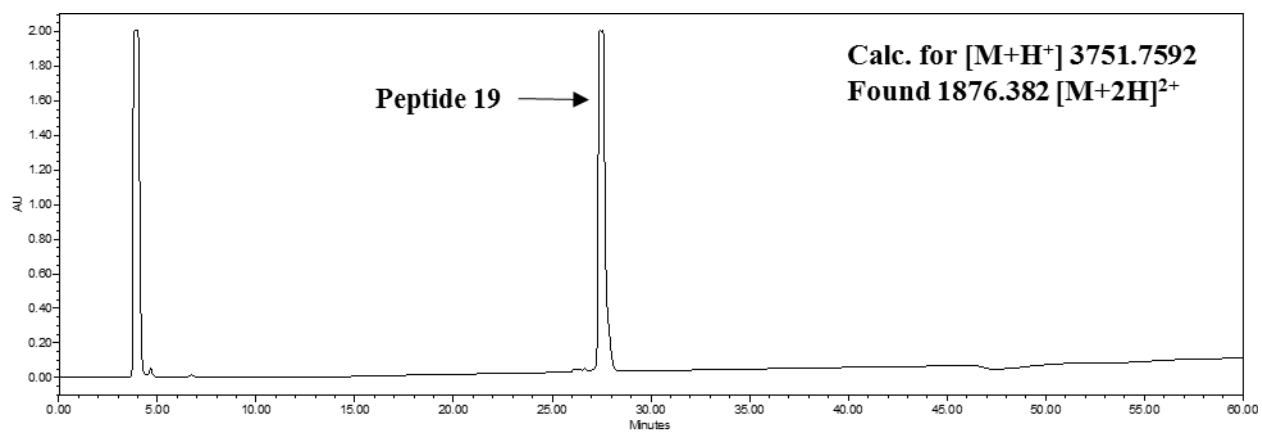

## Peptide 20

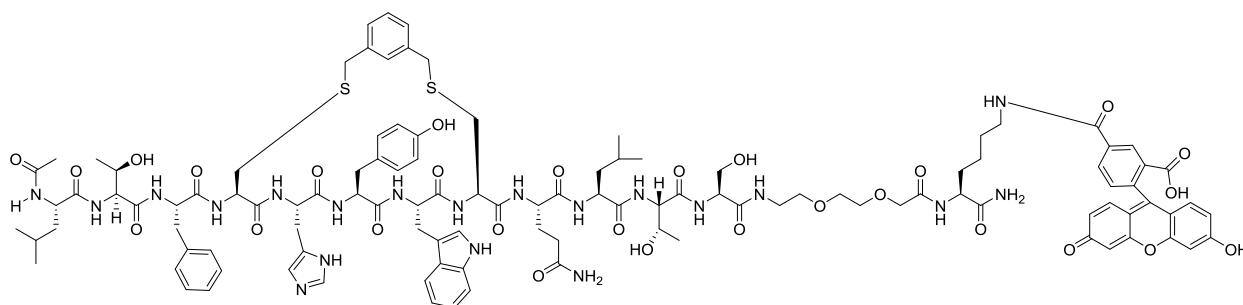

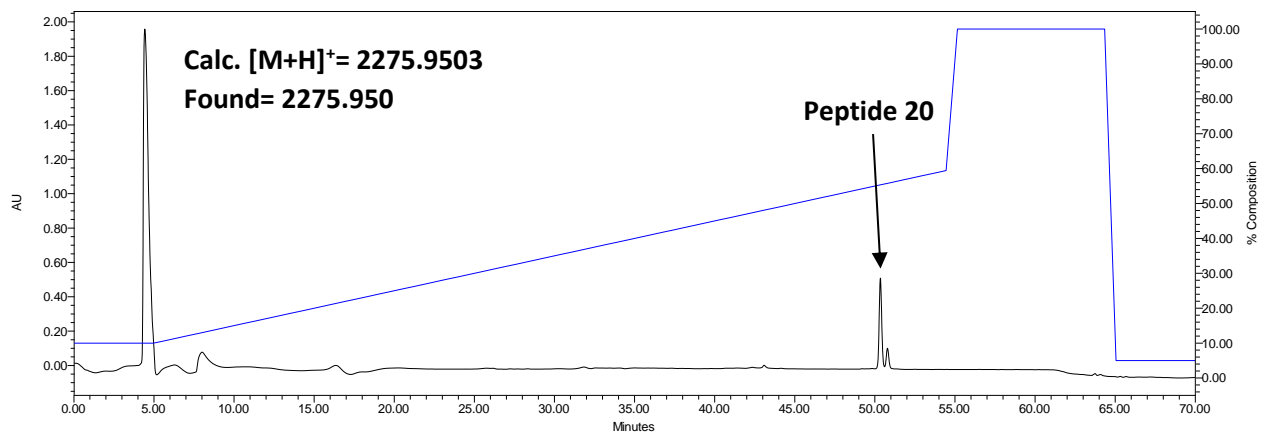

Peptide 21

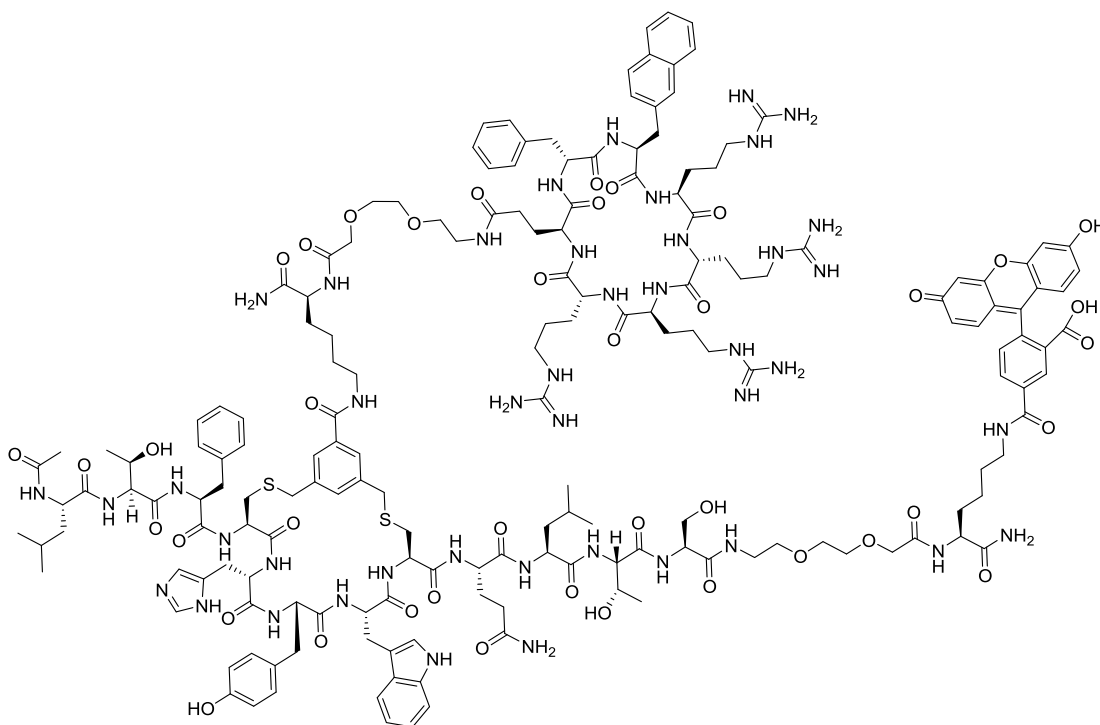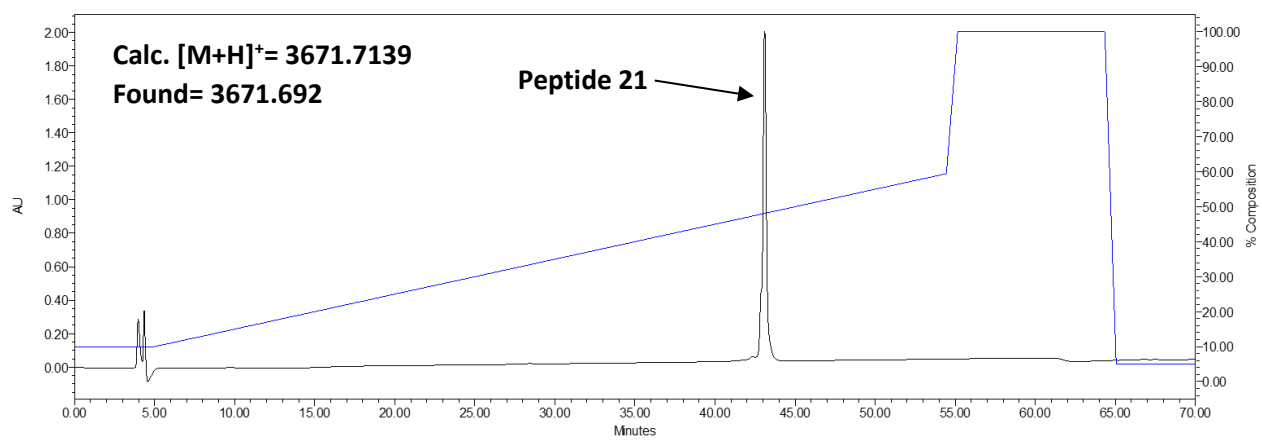

## Peptide 22

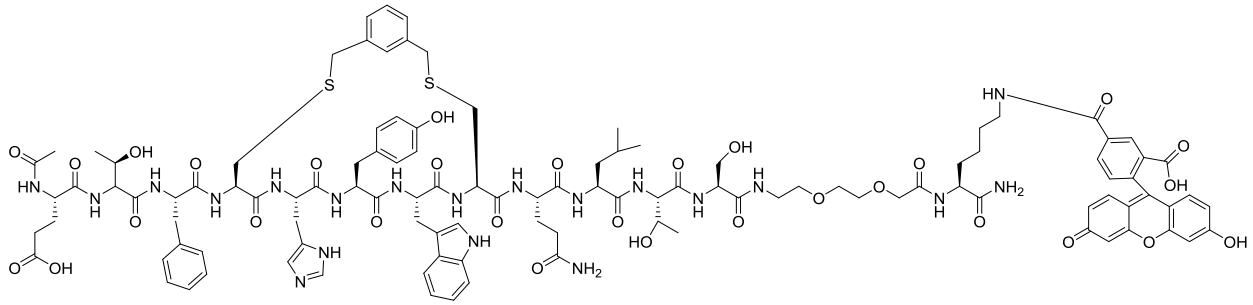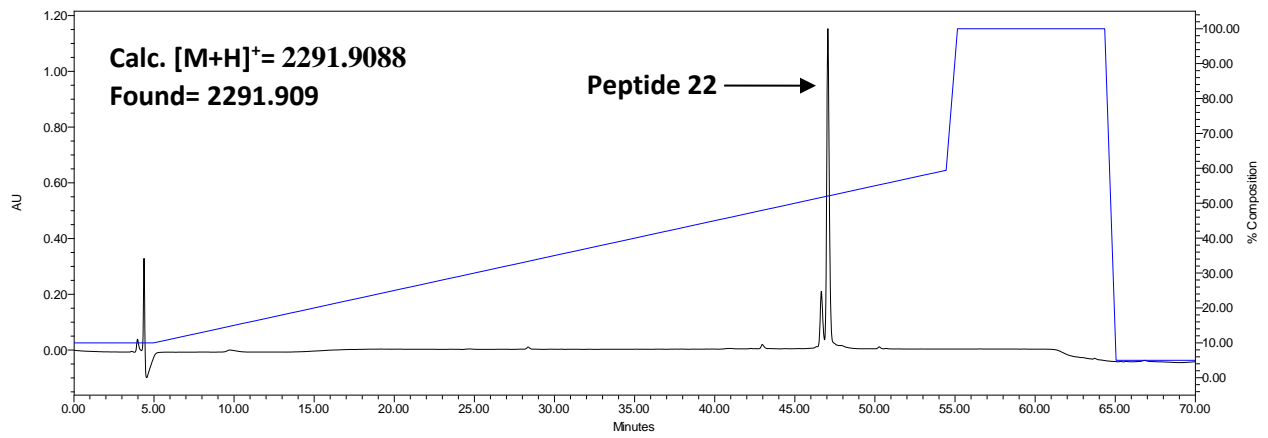

## Peptide 23

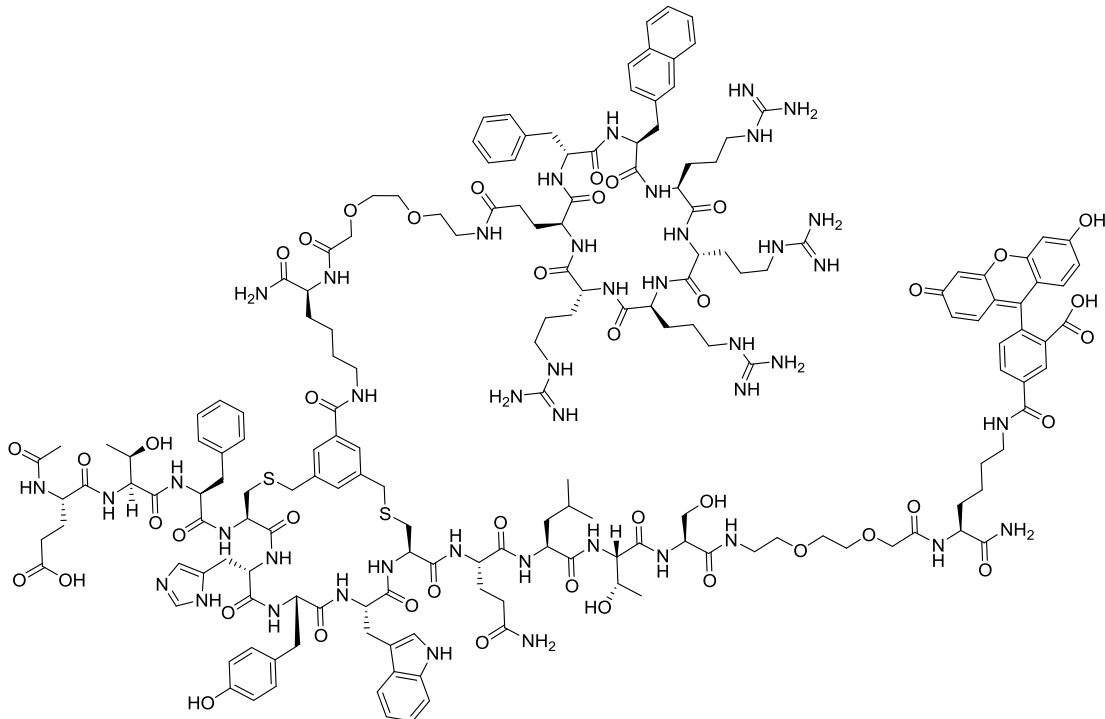

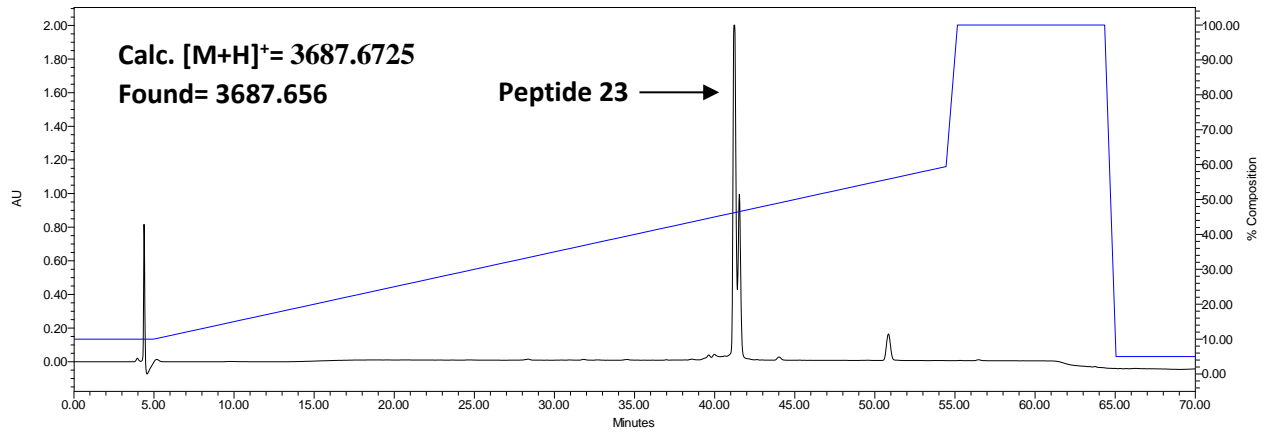

**Peptide 24**

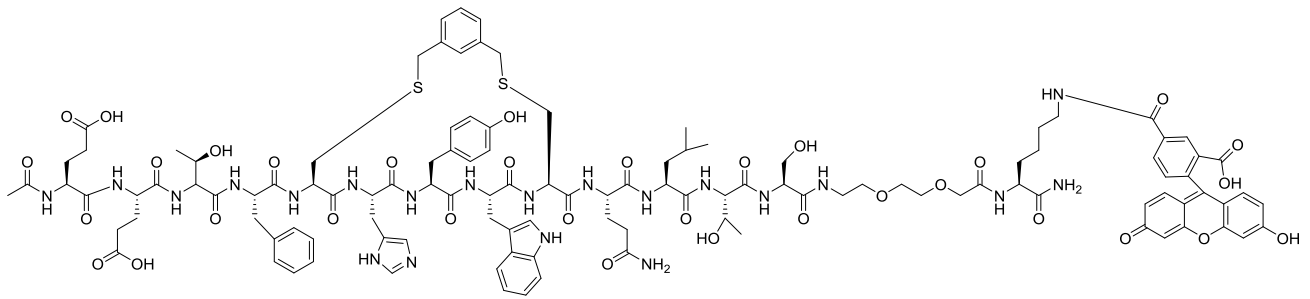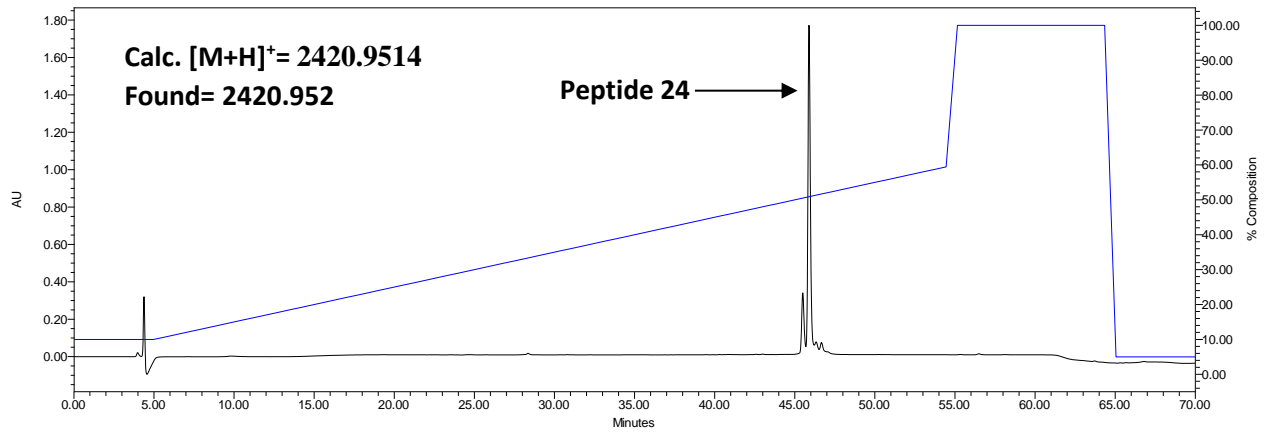





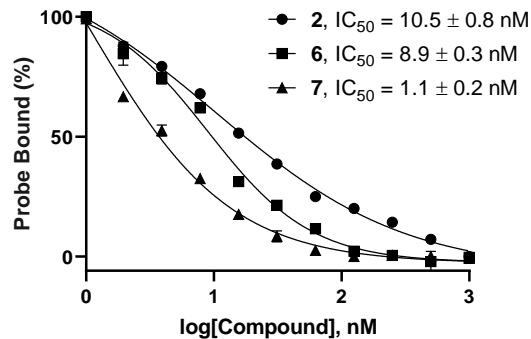

**Figure S2.** MDM2-binding affinity ( $IC_{50}$ ) of stapled PDI conjugated to Tat or  $R_9$  (peptides **6** and **7**) as measured by FP-base competition assay. Reaction contained 15 nM peptide **1** (probe), 15 nM GST-MDM2, and indicated concentration of peptide **2**, **6**, or **7** in PBS (pH 7.4) containing 5 mM DTT and 0.01% Triton-X100. FP values are relative to those at 0 (100%) and saturating concentration of competing peptide (0%). Data reported represent the mean  $\pm$  SD of three sets of independent experiments.

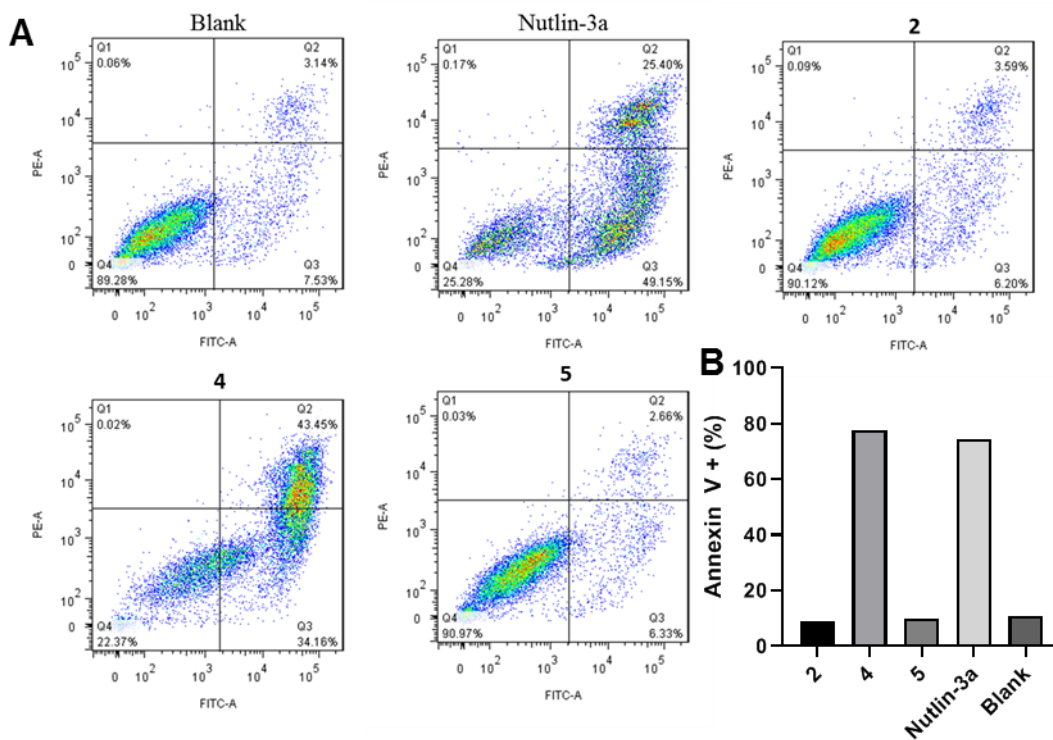

**Figure S3.** Apoptosis of SJS-1 cells induced by MDM2 inhibitors. Cells were seeded in 12-well plates at a density of  $1.0 \times 10^5$  cells/well in serum-free RPMI-1640 supplemented with 1% penicillin/streptomycin and incubated for 24 h at 37 °C in the presence of 5%  $CO_2$ . Compound was added to each well (final concentration = 10  $\mu$ M for peptide **4** and Nutlin-3a or 25  $\mu$ M for peptides **2** and **5**) in fresh RPMI-1640 supplemented with 10% FBS and 1% penicillin/streptomycin. Cells were incubated for 48 h, stained with Annexin V and PI, and analyzed by flow cytometry. (A) Flow cytometry data for untreated cells (blank) and cells after treatment with nutlin-3a or peptides **2**, **4**, or **5**. (B) Percentage of apoptotic cells (populations in Q2 and Q3) after compound treatment, from (A).

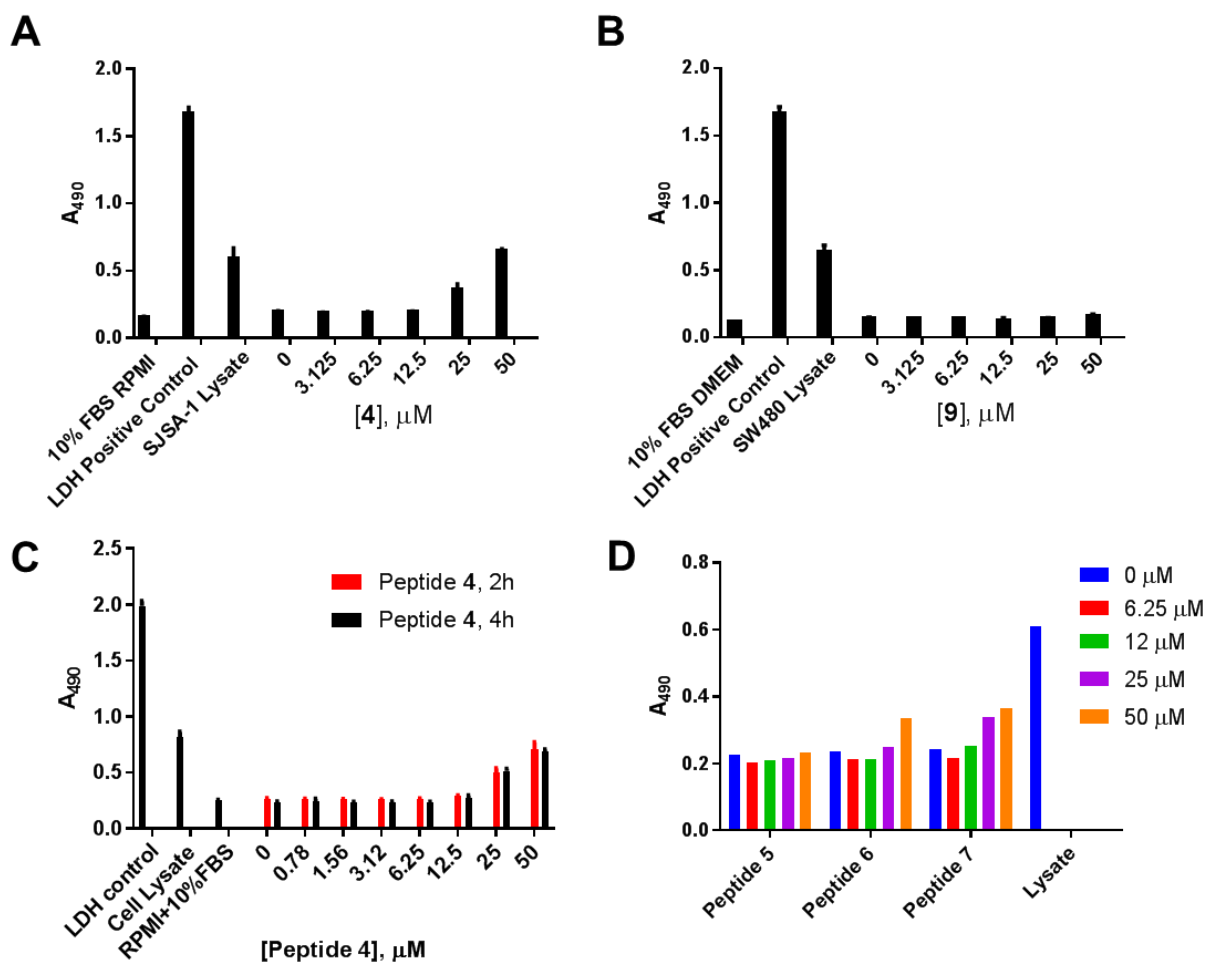

**Figure S4.** Lactate dehydrogenase (LDH) release caused by membrane disruption. (A) SJS-A-1 cells treated for 45 min with 0-50  $\mu\text{M}$  peptide 4. Data shown represent the mean  $\pm$  SD of three replicates from two independent experiments ( $n = 6$ ). (B) SW480 cells treated for 45 min with 0-50  $\mu\text{M}$  peptide 9. Data shown represent the mean  $\pm$  SD of three replicates from two independent experiments ( $n = 6$ ). (C) SJS-A-1 cells treated with peptide 4 for 2 or 4 h. Data shown represent the mean  $\pm$  SD of three independent experiments ( $n = 3$ ). (D) SJS-A-1 cells treated for 45 min with 0-50  $\mu\text{M}$  indicated peptides. Data shown were from a single set of experiments.

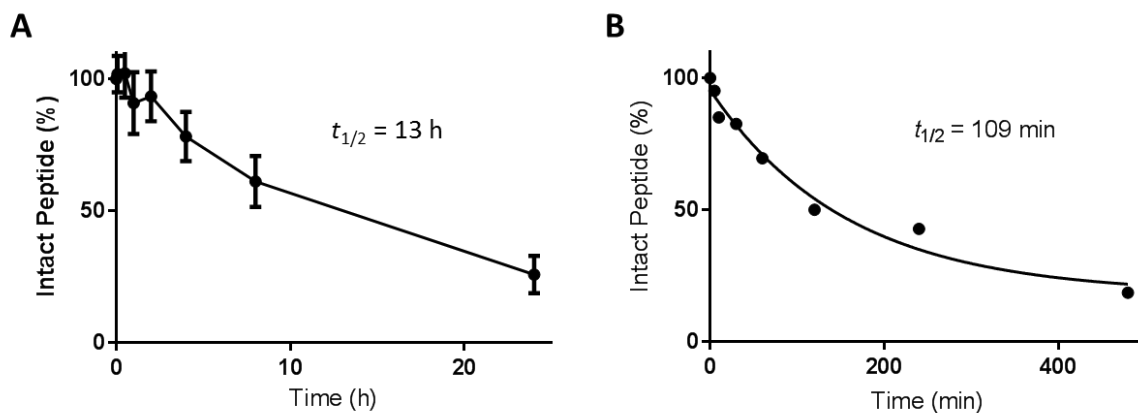

**Figure S5.** Stability of peptides **4** (a) and **9** (b) in human serum. Serum was diluted 1:4 in sterile DPBS (v/v) and equilibrated at 37 °C for 15 min. Peptide was added to the diluted serum to a final concentration of 100  $\mu$ M and incubated at 37 °C. At the indicated time points, 100- $\mu$ L aliquots were withdrawn, mixed with 100  $\mu$ L of 15% trichloroacetic acid (TCA) in MeOH (w/v) and 100  $\mu$ L of MeCN, and stored overnight at 4 °C. The samples were analyzed by RP-HPLC and the percentage of remaining peptide at a given time point was determined by integrating the peak area and compared it to that of the untreated control (100%). Data in (a) are the mean  $\pm$  SD of three independent experiments, where data in (b) were from a single set of experiment.

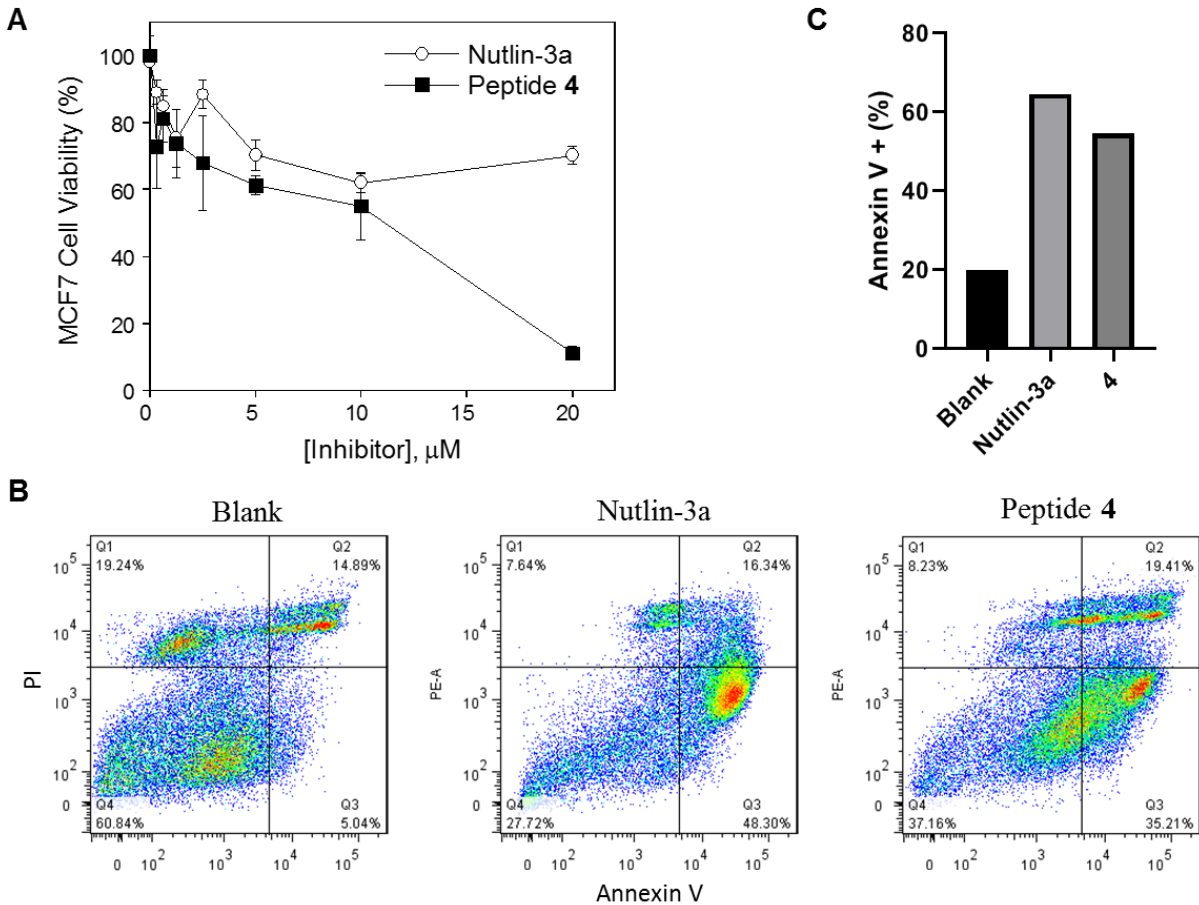

**Figure S6.** Induction of apoptotic death of MCF7 cells (which express WT p53 and display MDM2 and MDMX amplification) by peptide **4**. **(A)** Viability of MCF7 cells as a function of peptide **4** or nutlin-3a concentration (72 h treatment and in the presence of 10% FBS) as monitored by the MTT assay ( $n \geq 3$ ). **(B)** Annexin V/PI staining of MCF7 cells after treatment with MDM2 inhibitors. Cells were seeded in 12-well plates at a density of  $1.0 \times 10^5$  cells/well in MEM supplemented with 10% FBS, 1% penicillin/streptomycin and incubated for 24 h at 37 °C in the presence of 5% CO<sub>2</sub>. Each well was washed with warm DPBS and compound (5 μM peptide **4** or Nutlin-3a) was added to each well in fresh MEM supplemented with 10% FBS, 1% penicillin/streptomycin. Cells were incubated for 48 h, stained with Annexin V and PI, and analyzed by flow cytometry. **(C)** Percentage of apoptotic cells (populations in Q2 and Q3) with and without compound treatment from **(B)**.

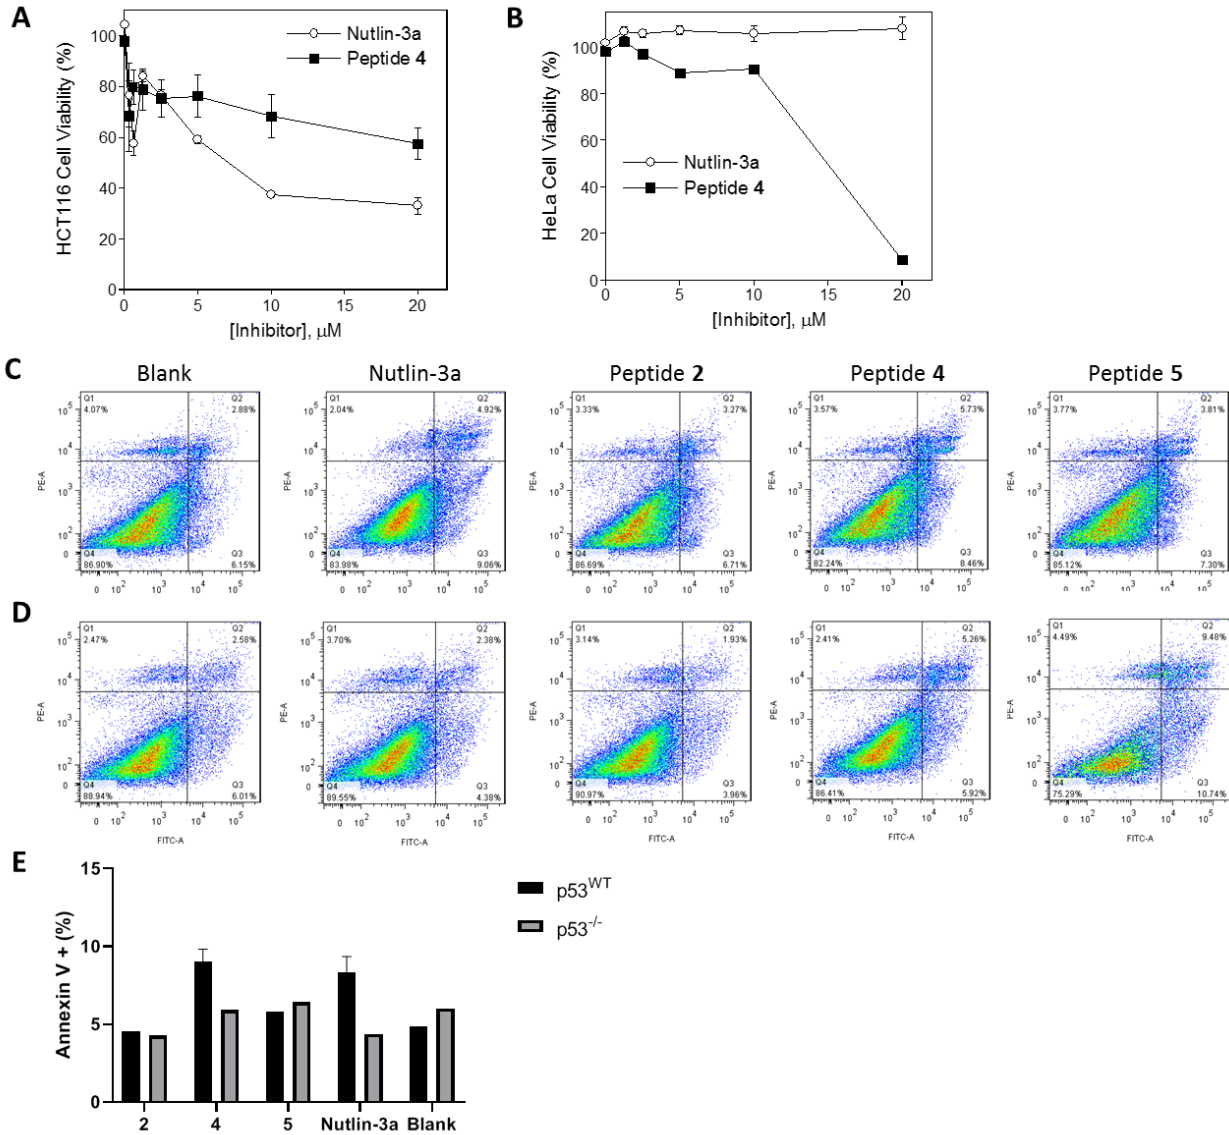

**Figure S7.** Effect of peptide 4 on the viability of HCT116 and HeLa cells. **(A)** Viability of HCT116 p53<sup>+/+</sup> cells as a function of peptide 4 or nutlin-3a concentration (72 h treatment and in the presence of 10% FBS) as monitored by the MTT assay (n = 3). **(B)** Viability of HeLa cells (which express WT p53) under the same condition as in (A) (n = 3). **(C, D)** Annexin V/PI staining in HCT116 p53<sup>WT</sup> (C) and p53<sup>-/-</sup> cells (D). HCT116 cells were seeded into 12-well plates at a final density of 1.0 x 10<sup>5</sup> cells/well in RPMI-1640 supplemented with 10% FBS, 1% penicillin/streptomycin and incubated for 24 h at 37 °C, 5% CO<sub>2</sub>. Each well was washed with warm DPBS and compound (5 μM) was added to each well in fresh RPMI-1640 supplemented with 10% FBS and 1% penicillin/streptomycin and incubated for 48h. Cells were stained with Annexin V and PI, and analyzed by flow cytometry. **(E)** Percentages of HCT116 p53<sup>+/+</sup> and HCT116 p53<sup>-/-</sup> cells that are positive for annexin V (Q2 + Q3 populations) after treatment with 5 μM peptide 2, 4, 5, or nutlin-3a in fresh RPMI-1640 supplemented with 10% FBS and 1% penicillin/streptomycin for 48 h. **Result:** Peptide 4 and nutlin-3a (but not peptide 2 or 5) resulted in p53-dependent apoptosis in a small fraction of p53<sup>WT</sup> cells (~5%), although HCT116 cells are less sensitive to MDM2-p53 inhibition than SJS-1 and MCF7 cells.

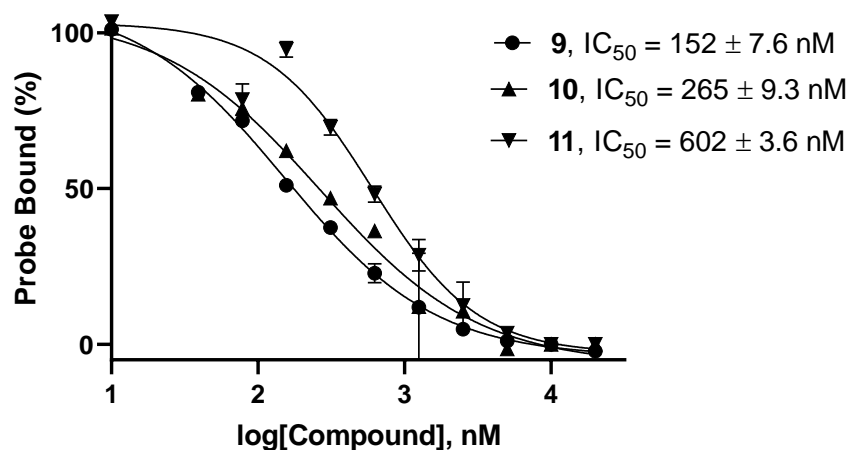

**Figure S8.** Competition for binding to  $\beta$ -catenin by peptides **9-11**. Reaction contained 10 nM FAM-labeled peptide **8** as probe and 50 nM GST- $\beta$ -catenin in 20 mM Tris, pH 8.8, 300 mM NaCl, 0.01% Triton-X100 was pre-incubated for 1 h at RT. Serial dilutions of peptide **9-11** were prepared in the same buffer and mixed with the above equilibrated complex for 1 h at RT. Values are normalized to fully bound/unbound FP values for peptide **9-FITC**. Data shown represent the mean  $\pm$  SD of three independent experiments.

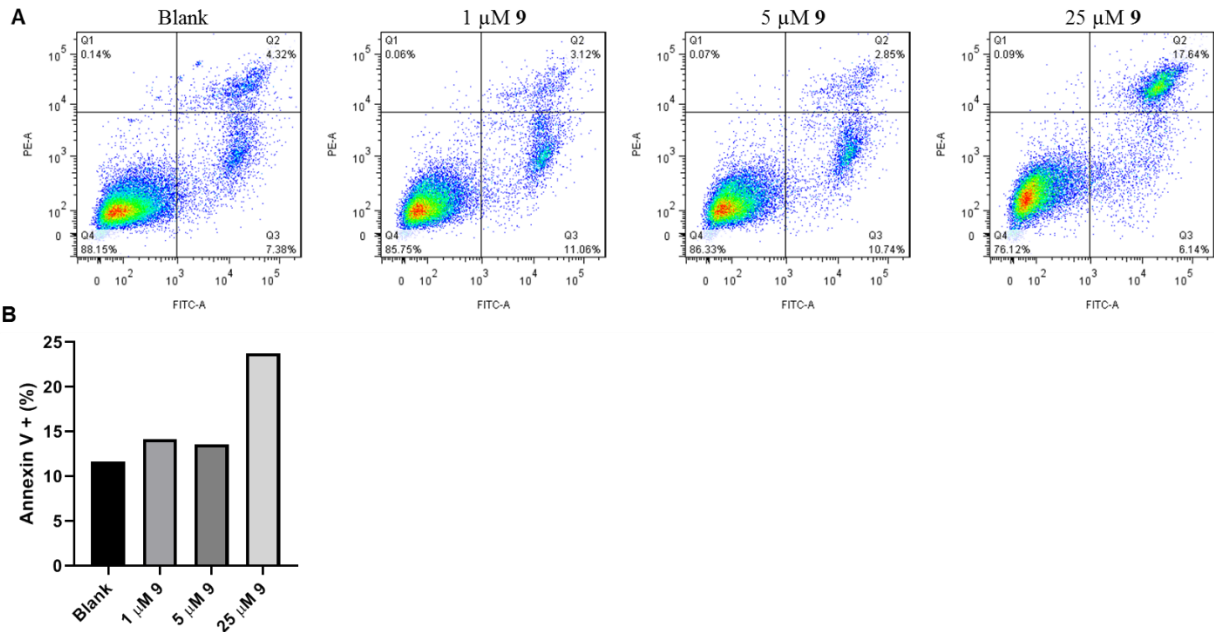

**Figure S9.** Annexin V/PI staining of SW480 cells after treatment with increasing concentrations of peptide **9**. Cells were seeded into 12-well plates at a final density of  $1.0 \times 10^5$  cells/well in RPMI-1640 supplemented with 10% FBS, 1% penicillin/streptomycin and incubated for 24 h at 37 °C in the presence of 5% CO<sub>2</sub>. The cells were washed with warm DPBS and treated with 0-25  $\mu\text{M}$  peptide in fresh RPMI-1640 supplemented with 10% FBS and 1% penicillin/streptomycin for 48 h. Annexin V/PI staining was performed as described above. **(A)** Flow cytometry data for untreated cells (blank) and cells after treatment with 1, 5, or 25  $\mu\text{M}$  peptide **9**. **(B)** Percentage of apoptotic cells (populations in Q2 and Q3) with and without compound treatment from **(A)**.



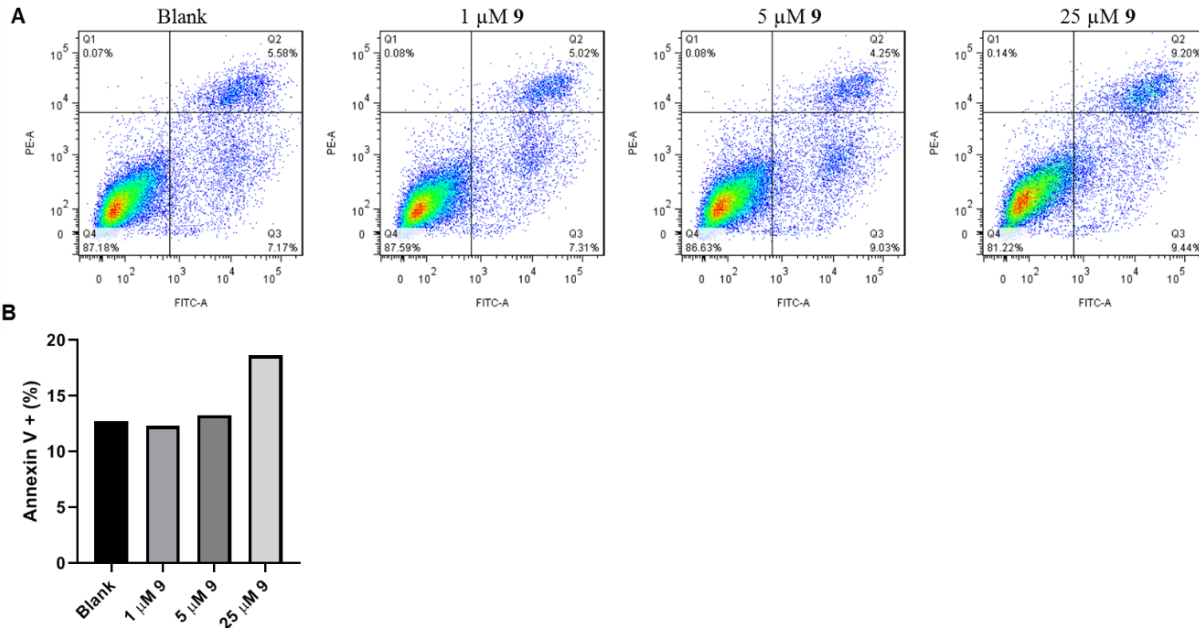

**Figure S10.** Annexin V/PI staining of DLD-1 cells after treatment with increasing concentrations of peptide **9**. Cells were seeded into 12-well plates at a final density of  $1.0 \times 10^5$  cells/well in RPMI-1640 supplemented with 10% FBS, 1% penicillin/streptomycin and incubated for 24 h at 37 °C in the presence of 5% CO<sub>2</sub>. The cells were washed with warm DPBS and treated with 0-25  $\mu\text{M}$  peptide in fresh RPMI-1640 supplemented with 10% FBS and 1% penicillin/streptomycin for 48 h. Annexin V/PI staining was performed as described above. **(A)** Flow cytometry data for untreated cells (blank) and cells after treatment with 1, 5, or 25  $\mu\text{M}$  peptide **9**. **(B)** Percentage of apoptotic cells (populations in Q2 and Q3) with and without compound treatment from **(A)**.

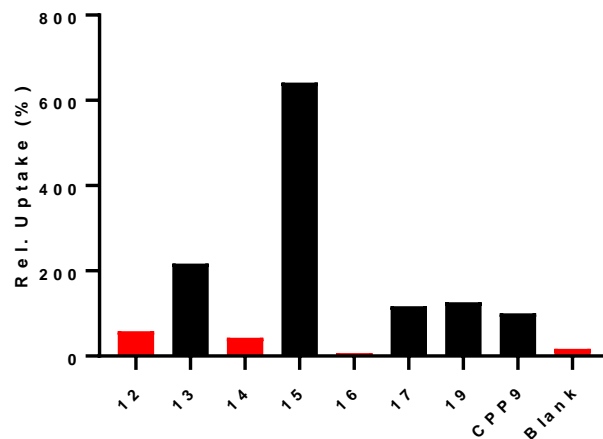

**Figure S11.** Comparison of the cytosolic entry efficiencies of unconjugated (peptides **12**, **14**, and **16**) and CPP9-conjugated peptides (peptides **13**, **15**, **17**, and **19**) as analyzed by flow cytometry at pH 6.5. HeLa cells ( $1.5 \times 10^5$  cells/well) were incubated with 0 (blank) or 5  $\mu\text{M}$  NF-labeled peptide for 2 h in the presence of 10% FBS. Cells were harvested and washed. Immediately before flow cytometry analysis, the pH of the cell suspension was lowered to 6.5 by the addition of 0.2 M glycine-HCl (pH 2.0) to quench the fluorescence of any cell surface-associated peptide. All values are relative to that of CPP9 (100%).
